# Supplementary material for: Genome-wide Identification of R2R3-MYB Gene Family and Response to Stress in Zingiber officinale Roscoe
Source: Research Square preprint supplement (doi:10.21203/rs.3.rs-1661228/v1), 2022-05-26
Supplement: Supplementary file 1 [file 749049c32004e92636495bb9.xlsx]

## Sheet: Sheet1
Table S3.PCR primers used for quantitative real-time PCR analysis
Gene Name	Forward Primer (5'to 3')	Reverse Primer (5'to 3')
ZoMYB026	TGGCTACAACAACGACAACACTCTC	CCACTGCTGCTACTCGGATTGAC
ZoMYB046	GTACGCATCCAGCACGGAGAAC	AGCAGCAGTAGAGGTAGAGCAGTC
ZoMYB061	TGCAGAGTTTTGTATCGACGAGGTG	CGCCGACGACGATGAAGATGAG
ZoMYB084	GCATGAGACTCTCGGCAATAGGTG	TGGGTCGGTTTGATTCGCTTCTTC
ZoMYB148	CATCTCCAATAACCGTGGCTCCTC	GCCGTGTCCACCGTTCAAGAAG
ZoMYB157	ATTGCTGCGAGTTTGCCTGGTAG	TCCTCTTCTTCGTCGGCTCTATCTG
ZoMYB164	GAAGAGCCGGTGGATAAGGAAGAAC	GAGGTGGAAGACGACGAAGAGTTG
ZoMYB183	ACCAACCTCCTCTCGTCTCAGTATC	CCATTGAGTGTCGTCCAAGGTCTG
ZoMYB222	CATGGCACGACGACAACGAGAG	GGAGAAAGCCGCCCAAGAAAGAG
ZoMYB263	GATGTCGTATCTGGAGTCGTGGTTG	GTCACTAACAGCAGCCATGTCCTC
Actin	AGATGCCCAGAGGTCCTTTT	CATAGTTGATCCACCGCTGA
